# Supplementary material for: Location and freedom of single and double guest in dye-doped polymer nanoparticles
Source: Royal Society of Chemistry journal article supplement (doi:10.1039/c4pp00203b), 2014-09-03
Supplement: c4pp00203b1.pdf [file c4pp00203b1.pdf]

**Supporting Information**  
**For**  
**Location and Freedom of Single and Double Guest in Dye-**  
**Doped Polymer Nanoparticles**

Cristina Martín, Maria Rosaria di Nunzio, Boiko Cohen, and Abderrazzak Douhal\*

Departamento de Química Física, Facultad de Ciencias Ambientales y Bioquímica, and INAMOL, Universidad de Castilla-La Mancha, Avenida Carlos III, S/N, 45071 Toledo, Spain.

\*corresponding author: Abderrazzak.Douhal@uclm.es

Phone number: +34-925-265717

Departamento de Química Física, Facultad de Ciencias Ambientales y Bioquímica, and INAMOL, Universidad de Castilla-La Mancha, Avenida Carlos III, S/N, 45071 Toledo, Spain.

### Description of ET calculations:

Förster fluorescence resonance energy transfer (FRET) is a non-radiative process whereby the energy is transferred from an excited-state donor (D, usually a fluorophore) to a neighbouring ground-state acceptor (A) through a long-range dipole-dipole interaction between the two chromophores. This process happens by resonance interaction between both chromophores, over distances considerably greater than the interatomic ones, without conversion to thermal energy, and without kinetic collision of D and A. The D molecules are the species that initially absorbs the exciting-photon energy, and further transfer the exciton energy towards the consecutive acceptor dye molecules. The efficiency (E) of energy transfer from D to A is related to the distance (R) between the involved chromophores, according to the equation:

$$E = 1 - \left( \frac{\Phi}{\Phi_0} \right) = 1 - \left( \frac{F}{F_0} \right) \quad (1)$$

$$E = \frac{R_0^6}{(R_0^6 + R^6)} \quad (2)$$

where  $\Phi_0$  and  $\Phi$  (or F and  $F_0$ ) are the fluorescence quantum yields (or emission intensity) of D in absence and presence of an equal amount of A, respectively.  $R_0$  is the Förster critical distance between the involved chromophores at which 50% of the excitation energy in D is transferred to A.  $R_0$  can be obtained from the equation 3:<sup>1</sup>

$$R_0^6 = \left( \frac{9000(\ln 10)\phi_D\kappa^2}{128\pi^5 N_A n^4} \right) J(\lambda) \quad (3)$$

where  $\Phi_D$  is the fluorescence quantum yield of D in absence of A ( $\Phi_D = 0.2$  for C153 and 0.1 NR)<sup>2, 3</sup>,  $n$  is the refractive index of the solution ( $n = 1.696$ )<sup>2</sup> and  $\kappa$  is the orientation factor, commonly taken as 2/3, assuming a relatively random orientation of both D and A chromophores. The spectral overlap  $J(\lambda)$  between the emission spectrum of D and absorption one of A is given by equation 4:

$$J = \frac{\int_0^\infty F(\lambda)\varepsilon(\lambda)\lambda^4 d\lambda}{\int_0^\infty F(\lambda)d\lambda} \quad (4)$$

where  $F(\lambda)$  accounts for the emission intensity of D at a wavelength  $\lambda$ , and  $\varepsilon(\lambda)$  is the molar absorption coefficient of A at  $\lambda$ .

According to Förster's theory, the rate constant of such process is given by:<sup>1</sup>

$$k_{ET} = \frac{1}{\tau_D} \left( \frac{R_0}{R} \right)^6 \quad (5)$$

where  $\tau_D$  is the mean fluorescence lifetime of the D.

Combining equations 5 and 1 we get the efficiency of energy transfer (eq. 6):

$$E = \frac{R_0^6}{R_0^6 + R^6} \quad (6)$$

Considering a possible homo-FRET (between the same chromophores) the values of the spectral overlap integral (Eq. 4) ( $J/10^{14} \text{ M}^{-1}\text{cm}^{-1}\text{nm}^4$ ) are 0.76 and 7.43 for C153 and NR, respectively. Following equation 3, the obtained  $R_0$  values are 2.18 and 2.84 nm for C153 and NR, respectively.

To calculate the interchromophoric distances in the PVK nanoparticles we assume that the dyes are homogeneously distributed inside of the inner volume of a perfect sphere of 60 nm in diameter (volume =  $1.13 \times 10^5 \text{ nm}^3$ ). The number of dye molecules inside the NP was calculated following a model described elsewhere,<sup>4</sup> and the obtained values are 7600 for C153 and 4100 for NR for wt% of 2.6 and 1.6, respectively. The ratio between the number of dye molecules and the volume give us the available volume for each dye molecule inside the NP and therefore the distance between them assuming that all the molecules are distributed homogeneously through the entire volume of the NP. According to that, the  $R$  is 3.05 and 3.75 nm for 2.7 % wt C153 and 1.6 % wt NR doped NP, respectively. The calculated homo-energy transfer (homo - ET) efficiencies are 11 % for C153 (2.7 % wt C153) and 15% for PVK:NR (1.6 % wt C153).

### Description of Wobbling-in-a-Cone Model:

The functions were used to extract the WIC parameters:<sup>5, 6</sup>

$$r(t) = r_0 [a \exp(-t/\tau_{slow}) + (1-a) \exp(-t/\tau_{fast})] \quad (7)$$

Here,  $\tau_{slow}$  and  $\tau_{fast}$  are the two reorientation times associated with the slow and fast motions of the dye molecules in the polymer nanoparticles, respectively.  $a$  is the pre-exponential factor giving the relative contributions of the two rotational decays to the total anisotropy signal.  $r_0$  is the limiting anisotropy, which describes the inherent depolarization for a given molecule.

Assuming that the slow and the fast molecular motions in the nanoparticle's interior are separable, we can apply the following relationships:

$$\frac{1}{\tau_{fast}} = \frac{1}{\tau_R} + \frac{1}{\tau_{slow}} \quad (8)$$

$$\frac{1}{\tau_{slow}} = \frac{1}{\tau_D} + \frac{1}{\tau_M} \quad (9)$$

In Equations 8 and 9,  $\tau_R$  and  $\tau_D$  are the fast wobbling motion and the slow lateral diffusion of the encapsulated molecule inside the polymer nanoparticle's domain and along side its surface, respectively. These two molecular motions are joined with the overall rotation of the polymer nanosphere in aqueous suspensions, which we call  $\tau_M$ .

The latter is the time constant for the overall rotation of the nanoparticle and can be estimated from the Stokes-Einstein-Debye (SDE) equation under stick boundary conditions:

$$\tau_M = \frac{4\pi\eta r_M^3}{3k_B T} \quad (10)$$

Here,  $\eta$  is the viscosity of the medium,  $k_B$  is the Boltzmann constant,  $T$  is the temperature, and  $r_M$  is the hydrodynamic radius of the polymer nanoparticle. In our case,  $r_M$  (30 nm) is determined from the average size of the polymer NP (50-70 nm), which is constant for all the systems, as it has been demonstrated in previous studies.<sup>7</sup>

The  $\tau_M$  value is 14.2  $\mu$ s for the studied dye-doped PVK nanoparticle systems. As  $\tau_M$  resides in the microsecond region, it has a negligible effect on the lateral diffusion phenomena. According to the WIC model, the internal motion of each trapped molecule wobbling inside a cone can be described in terms of cone semi-angle ( $\theta_0$ ) and wobbling diffusion coefficient ( $D_w$ ). The  $\theta_0$  value defines the order parameter  $S$  as in Equation 11:

$$S = 0.5 \cos \theta_0 (1 + \cos \theta_0) \quad (11)$$

The order parameter is also related with the amplitude of the slower component of anisotropy decay by:

$$S = \sqrt{a} \quad (12)$$

The diffusion coefficient for wobbling motion  $D_w$  is calculated by using Equation 6:

$$D_w = \frac{\cos^2 \theta (1 + \cos \theta)^2}{2(\cos \theta - 1)(1 - S^2) \tau_R} \left\{ \ln \left( \frac{1 + \cos \theta}{2} \right) + \frac{(1 - \cos \theta)}{2} \right\} + \frac{(1 - \cos \theta)}{24(1 - S^2) \tau_R} (6 + 8 \cos \theta - \cos^2 \theta - 12 \cos^3 \theta - 7 \cos^4 \theta) \quad (13)$$

On the other hand, the translational diffusion constant ( $D_L$ ) is related to the lateral diffusion time  $\tau_D$  by the Stokes-Einstein (SE) relationship:

$$D_L = \frac{r_M^2}{6\tau_D} \quad (14)$$

In Equation 8,  $r_M$  is the radius of the polymer NP where the molecular rotation takes place.

For the above model, the anisotropy decay function due to the wobbling and translation motion could be written as:

$$r(t) = r_0 [S^2 + (1 - S^2) \exp(-t/\tau_R)] \exp(-t/\tau_D) \quad (15)$$

### Determination of the Errors on the WIC Parameters

The estimated errors for  $\tau_{\text{slow}}$ ,  $\tau_{\text{fast}}$ , are 10-15 % and those have been used to calculate the associated errors to the WIC parameters,  $\tau_R$ ,  $\tau_D$ ,  $S^2$ , and  $\theta_0$  using equation 8, 9, 11 and 12, applying the concept of first derivative:

$$dy/dx = f'(x) \quad (16)$$

Therefore, the associated error,  $\Delta y$  is given by:<sup>8</sup>

$$\Delta y = |f'(x)| \Delta x \quad (17)$$

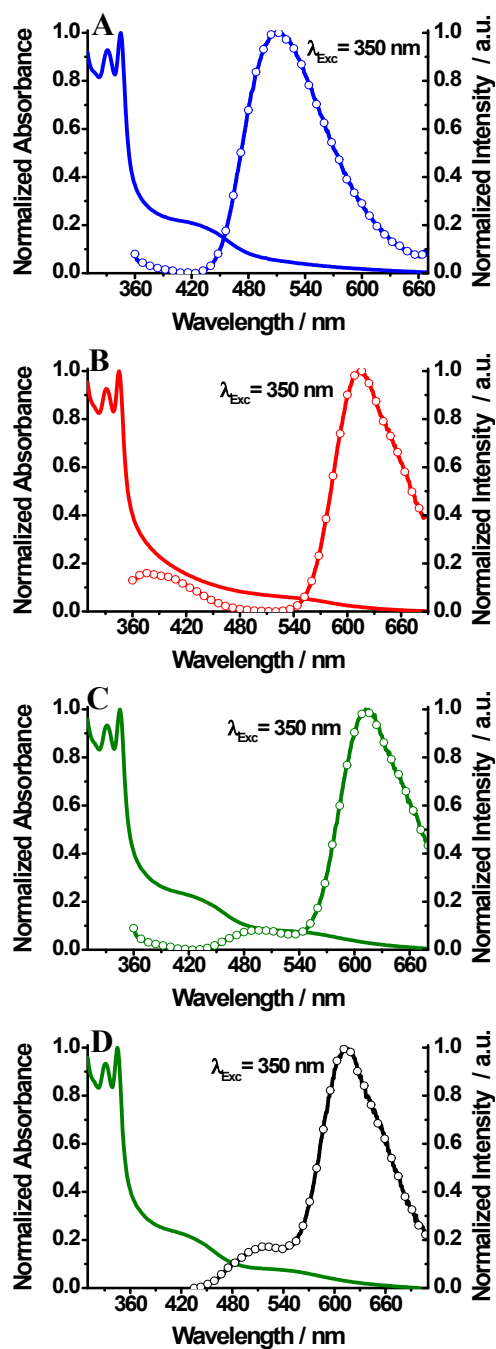

**Figure 1S.** Normalized (to their maximum of intensity) UV-visible absorption and emission spectra of water suspensions containing pure and doped-PVK polymer NPs: A) PVK:C153(2.72 wt%) NPs,  $\lambda_{\text{exc}} = 350$  nm; B) PVK:NR(1.60 wt%) NPs,  $\lambda_{\text{exc}} = 350$  nm; C) PVK:C153(2.72 wt%):NR(1.60 wt%) NPs,  $\lambda_{\text{exc}} = 350$  nm; D) PVK:C153(2.72 wt%):NR(1.60 wt%) NPs,  $\lambda_{\text{exc}} = 410$  nm. The solid lines represent the absorbance spectra, while the emission spectra are drawn as dots and lines.

**Table 1S.** Values of anisotropic decay parameters (rotational time constants,  $\phi_i$ ; normalized (to 100) pre-exponential factors,  $A_i$ ; fundamental anisotropy,  $r_0$ ) for (A) PVK:C153(0.22-2.72 wt%), (B) PVK:NR(0.63-1.60 wt%), (C) PVK:C153(0-2.70 wt%):NR(1.60 wt%), and (D) PVK:C153(2.72 wt%):NR(0-1.60 wt%).

**A**

| <b>PVK:C153</b> |                                 |                                 |                         |
|-----------------|---------------------------------|---------------------------------|-------------------------|
| <b>wt%</b>      | <b><math>\phi_1</math> / ns</b> | <b><math>\phi_2</math> / ns</b> | <b><math>r_0</math></b> |
| <b>C153</b>     | <b>(<math>A_1</math>%)</b>      | <b>(<math>A_2</math>%)</b>      |                         |
| 0.22            | 0.19 (38)                       | 4.63 (62)                       | 0.12                    |
| 0.54            | 0.18 (46)                       | 3.43 (54)                       | 0.16                    |
| 1.08            | 0.17 (53)                       | 2.42 (47)                       | 0.18                    |
| 2.18            | 0.14 (63)                       | 1.78 (37)                       | 0.19                    |
| 2.72            | 0.13 (67)                       | 1.57 (33)                       | 0.19                    |

**B**

| <b>PVK:NR</b> |                                 |                                 |                                 |                         |
|---------------|---------------------------------|---------------------------------|---------------------------------|-------------------------|
| <b>wt%</b>    | <b><math>\phi_1</math> / ps</b> | <b><math>\phi_2</math> / ns</b> | <b><math>\phi_3</math> / ns</b> | <b><math>r_0</math></b> |
| <b>NR</b>     | <b>(<math>A_1</math>%)</b>      | <b>(<math>A_2</math>%)</b>      | <b>(<math>A_3</math>%)</b>      |                         |
| 0.63          | 15 (75)                         | 0.30 (8)                        | 12.2 (17)                       | 0.17                    |
| 0.95          | 15 (77)                         | 0.30 (9)                        | 8.01 (14)                       | 0.17                    |
| 1.27          | 19 (77)                         | 0.30 (10)                       | 4.41 (13)                       | 0.17                    |
| 1.60          | 16 (78)                         | 0.27 (11)                       | 3.09 (11)                       | 0.17                    |

**C**

| <b>PVK:C153:NR (wt% NR fixed to 1.60)</b> |                                                      |                                                      |                                                      |                      |
|-------------------------------------------|------------------------------------------------------|------------------------------------------------------|------------------------------------------------------|----------------------|
| <b>wt%<br/>C153</b>                       | <b><math>\phi_1</math> / ps<br/>(A<sub>1</sub>%)</b> | <b><math>\phi_2</math> / ns<br/>(A<sub>2</sub>%)</b> | <b><math>\phi_3</math> / ns<br/>(A<sub>3</sub>%)</b> | <b>r<sub>0</sub></b> |
| 0                                         | 16 (78)                                              | 0.27 (11)                                            | 3.09 (11)                                            | 0.17                 |
| 0.14                                      | 22 (79)                                              | 0.31 (12)                                            | 3.97 (9)                                             | 0.19                 |
| 0.54                                      | 22 (78)                                              | 0.28 (15)                                            | 4.38 (7)                                             | 0.20                 |
| 1.09                                      | 22 (77)                                              | 0.29 (15)                                            | 5.12 (8)                                             | 0.21                 |
| 1.63                                      | 22 (74)                                              | 0.31 (16)                                            | 5.96 (10)                                            | 0.22                 |
| 2.18                                      | 22 (72)                                              | 0.32 (17)                                            | 6.93 (11)                                            | 0.22                 |
| 2.70                                      | 22 (71)                                              | 0.46 (18)                                            | 7.00 (11)                                            | 0.22                 |

**D**

| <b>PVK:C153:NR (wt% C153 fixed to 2.72)</b> |                                                      |                                                      |                      |
|---------------------------------------------|------------------------------------------------------|------------------------------------------------------|----------------------|
| <b>wt%<br/>NR</b>                           | <b><math>\phi_1</math> / ns<br/>(A<sub>1</sub>%)</b> | <b><math>\phi_2</math> / ns<br/>(A<sub>2</sub>%)</b> | <b>r<sub>0</sub></b> |
| 0                                           | 0.13 (67)                                            | 1.57 (33)                                            | 0.19                 |
| 0.08                                        | 0.12 (70)                                            | 1.34 (30)                                            | 0.22                 |
| 0.15                                        | 0.11 (73)                                            | 1.22 (27)                                            | 0.23                 |
| 0.32                                        | 0.058 (77)                                           | 0.90 (23)                                            | 0.27                 |
| 0.63                                        | 0.043 (82)                                           | 0.78 (18)                                            | 0.30                 |
| 0.96                                        | 0.030 (84)                                           | 0.70 (16)                                            | 0.36                 |
| 1.60                                        | 0.030 (84)                                           | 0.69 (16)                                            | 0.38                 |

**References:**

1. J. R. Lakowicz, *Principles of Fluorescence Spectroscopy*, 4th edn., Springer US, 2006.
2. S. Bhattacharyya, B. Paramanik and A. Patra, *J. Phys. Chem. C*, 2011, **115**, 20832-20839.
3. S. Bhattacharyya, S. Prashanthi, P. R. Bangal and A. Patra, *J. Phys. Chem. C*, 2013, **117**, 26750-26759.
4. C. Wu, Y. Zheng, C. Szymanski and J. McNeill, *J. Phys. Chem. C*, 2008, **112**, 1772-1781.
5. G. Lipari and A. Szabo, *Biophys. J.*, 1980, **30**, 489-506.
6. N. C. Maiti, M. M. G. Krishna, P. J. Britto and N. Periasamy, *J. Phys. Chem. B*, 1997, **101**, 11051-11060.
7. C. Martin, S. Bhattacharyya, A. Patra and A. Douhal, *Photochem. Photobiol. Sci.*, 2014, 10.1039/c1034pp00086b.
8. J. Taylor, *Introduction to Error Analysis, the Study of Uncertainties in Physical Measurements*, 1997.
